# Supplementary material for: A cobalt porphyrin-bridged covalent triazine polymer-derived electrode for efficient hydrogen production
Source: Royal Society of Chemistry journal article supplement (doi:10.1039/d4dt01016g), 2024-01-01
Supplement: d4dt01016g1.pdf [file d4dt01016g1.pdf]

## Supporting Information

### A cobalt porphyrin-bridged covalent triazine polymer derived electrode for efficient hydrogen production

Aijian Wang\*, Xin Yang, Fengqiang Zhang, Qitao Peng, Xiaoyu Zhai, Weihua Zhu\*

School of Chemistry & Chemical Engineering, Jiangsu University, Zhenjiang  
212013, P.R. China

Corresponding Author. Tel: +86-511-88791928. E-mail: [wajujs@ujs.edu.cn](mailto:wajujs@ujs.edu.cn).

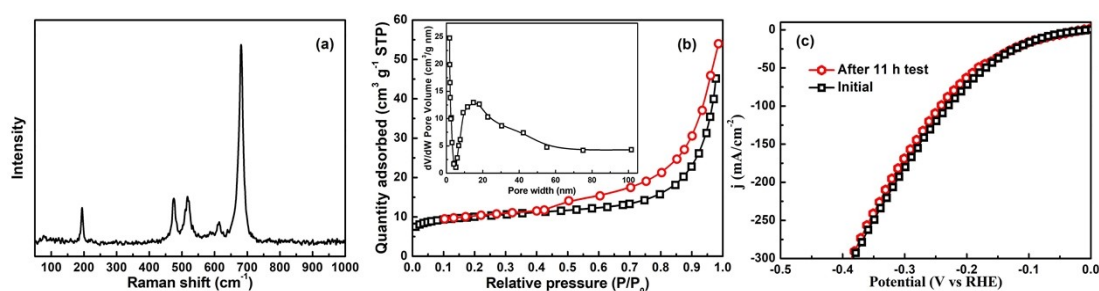

Figure S1. (a) Raman spectrum, (b)  $N_2$  adsorption-desorption isotherm of  $Co_{5.47}N/N,Co-C-800$  (Inset is pore size distribution), and (c) LSV curves of  $Co_{5.47}N/N,Co-C-800$  before and after stability measurement.

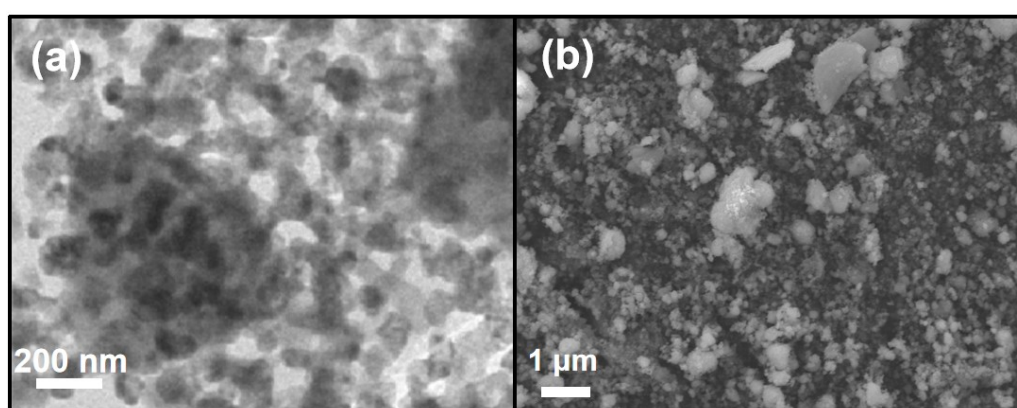

Figure S2. (a) TEM and (b) SEM images of  $Co_{5.47}N/N,Co-C-800$  after stability measurement.

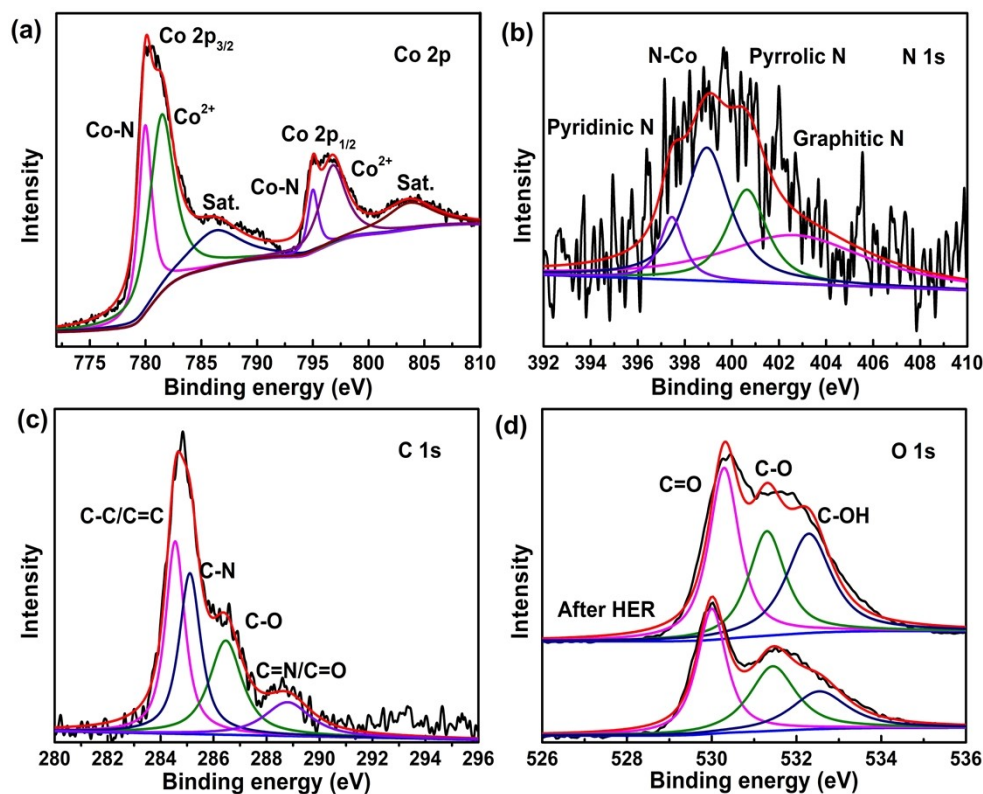

Figure S3. High-resolution XPS spectra of (a) Co 2p, (b) N 1s, and (c) C 1s core levels in  $\text{Co}_{5.47}\text{N}/\text{N},\text{Co-C-800}$  after HER; (d) High-resolution O 1s XPS spectra of  $\text{Co}_{5.47}\text{N}/\text{N},\text{Co-C-800}$  before and after HER.

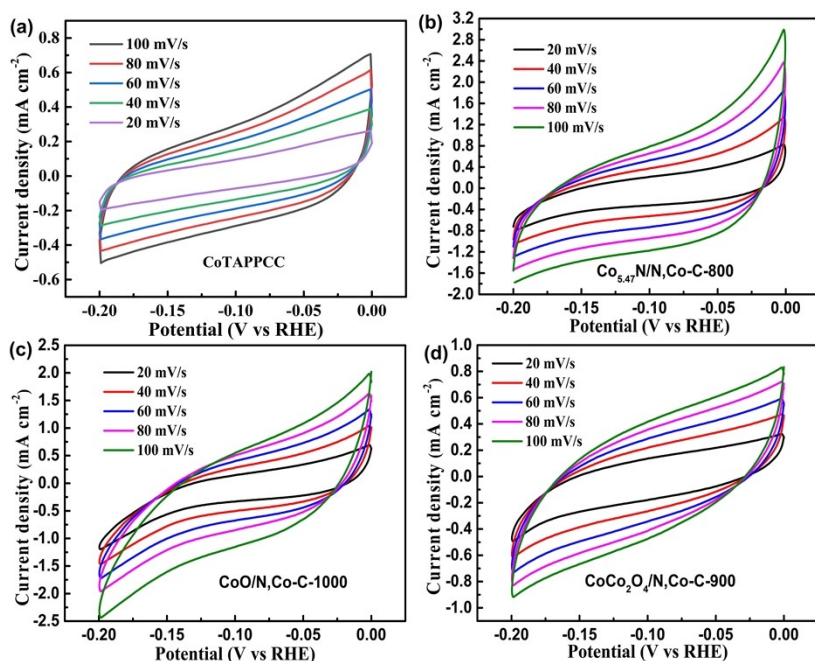

Figure S4. CV curves for the as-prepared samples at different scan rates: (a) CoTAPPCC, (b)  $\text{Co}_{5.47}\text{N}/\text{N},\text{Co-C-800}$ , (c)  $\text{CoO}/\text{N},\text{Co-C-1000}$ , and (d)  $\text{CoCo}_2\text{O}_4/\text{N},\text{Co-C-900}$ .

**Table S1.** Comparison of HER performance of Co<sub>5.47</sub>N/N,Co-C-800 with some other reported electrocatalysts at 10 mA cm<sup>-2</sup>.

| Electrocatalysts                                    | Overpotential (mV@10 mA cm <sup>-2</sup> )  | Refs.            |
|-----------------------------------------------------|---------------------------------------------|------------------|
| Co <sub>5.47</sub> N NP@N-PC                        | 149 (1.0 M KOH)                             | 1                |
| Co <sub>5.47</sub> N@N-rGO-750                      | 190 (1.0 M KOH)                             | 2                |
| Co <sub>5.47</sub> N-WO <sub>2</sub> @C/NF          | 36 (1.0 M KOH)                              | 3                |
| Co-Mo-N /NF                                         | 82 (1.0 M KOH)                              | 4                |
| CoFeN-NCNTs//CCM                                    | 151 (1 M KOH)                               | 5                |
| Co <sub>5.47</sub> N/Mo <sub>5</sub> N <sub>6</sub> | 44 (1 M KOH)                                | 6                |
| Fe, Ni-Co <sub>5.47</sub> N@N-VrGO-2                | 121 (0.5 M H <sub>2</sub> SO <sub>4</sub> ) | 7                |
| Co <sub>5.47</sub> N/rGO@NF                         | 123 (1.0 M KOH)                             | 8                |
| Mo <sub>2</sub> C@NCs                               | 110 (1.0 M KOH)                             | 9                |
| C, N, S-doped C                                     | 180 (0.5 M H <sub>2</sub> SO <sub>4</sub> ) | 10               |
| CoP-nph-CMP-800                                     | 360 (1.0 M KOH)                             | 11               |
| P@pCoPc-1/Co <sub>3</sub> O <sub>4</sub>  CC        | 120 (1.0 M KOH)                             | 12               |
| MoP/NF                                              | 114 (1.0 M KOH)                             | 13               |
| MoS <sub>2</sub> -MoP/C                             | 102 (1.0 M KOH)                             | 14               |
| phosphosulfide (MoPS)                               | 170 (1.0 M KOH)                             | 15               |
| MoP@NCHSs-900                                       | 92 (1.0 M KOH)                              | 16               |
| Ni, Co-doped MoP                                    | 102 (0.5 M H <sub>2</sub> SO <sub>4</sub> ) | 17               |
| CoP <sub>2</sub> /RGO                               | 88 (1.0 M KOH)                              | 18               |
| CoNi(1:1)-TB-800N <sub>2</sub>                      | 114 (1.0 M KOH)                             | 19               |
| Co <sub>9</sub> S <sub>8</sub> -40/CC               | 100 (1.0 M KOH)                             | 20               |
| Co-Ni <sub>3</sub> N                                | 225 (1.0 M KOH)                             | 21               |
| N-doped Mo <sub>2</sub> C                           | 99 (1.0 M KOH)                              | 22               |
| Ni/Mo <sub>2</sub> C(1:2)-NCNFs                     | 143 (1.0 M KOH)                             | 23               |
| Co <sub>5</sub> Mo <sub>1.0</sub> P NSs@NF          | 173                                         | 24               |
| Ni@Ni-Mo                                            | > 190                                       | 25               |
| Co <sub>0.75</sub> Ni <sub>0.25</sub> /CC           | 108                                         | 26               |
| <b>Co<sub>5.47</sub>N/N,Co-C-800</b>                | <b>76 (1.0 M KOH)</b>                       | <b>This work</b> |

**Table S2.** Comparison of HER performance of Co<sub>5.47</sub>N/N,Co-C-800 with some other reported electrocatalysts at 100 mA cm<sup>-2</sup>.

| Electrocatalysts                               | Overpotential (mV@100 mA cm <sup>-2</sup> )  | Refs.            |
|------------------------------------------------|----------------------------------------------|------------------|
| Co <sub>5.47</sub> N@N-rGO-750                 | ~320 (1 M KOH)                               | 2                |
| Co <sub>5</sub> Mo <sub>1.0</sub> P NSs@NF     | ~300 (1 M KOH)                               | 24               |
| Ni@Ni-Mo                                       | 276 (1 M KOH)                                | 25               |
| Co <sub>0.75</sub> Ni <sub>0.25</sub> /CC      | 237 (1 M KOH)                                | 26               |
| F-CTF-1-AA                                     | > 430 (1.0 M KOH)                            | 27               |
| Co-NCNTFs                                      | ~300 (1 M KOH)                               | 28               |
| Co <sub>2</sub> P@C                            | ~350 (0.5 M H <sub>2</sub> SO <sub>4</sub> ) | 29               |
| Co(OH) <sub>2</sub> @PANI                      | ~250 (0.5 M H <sub>2</sub> SO <sub>4</sub> ) | 30               |
| MoSe <sub>2</sub> -Mo <sub>2</sub> C           | ~250 (0.5 M H <sub>2</sub> SO <sub>4</sub> ) | 31               |
| graphene-Mo <sub>2</sub> C                     | ~370 (0.5 M H <sub>2</sub> SO <sub>4</sub> ) | 32               |
| Pd-PHE MA/NF-5000                              | ~350 (1 M KOH)                               | 33               |
| CoFeCo PBA                                     | ~320 (1 M KOH)                               | 34               |
| Ni(OH) <sub>2</sub> -Fe <sub>2</sub> P/Ti mesh | 252 (1 M KOH)                                | 35               |
| <b>Co<sub>5.47</sub>N/N,Co-C-800</b>           | <b>229 (1.0 M KOH)</b>                       | <b>This work</b> |

**Table S3.** Comparison of the XPS data of Co<sub>5.47</sub>N/N,Co-C-800 before and after the electrolysis.

| Species               | Peak positions before electrolysis (eV) | Peak positions after electrolysis (eV) |
|-----------------------|-----------------------------------------|----------------------------------------|
| Co <sup>2+</sup> ions | 781.5/796.6                             | 781.3/796.5                            |
| Co-N bonds            | 779.9/794.8                             | 779.8/794.9                            |
| N 1s                  | 398.2/398.9/400.7/401.9                 | 397.5/398.7/400.6/402.6                |
| C 1s                  | 284.6/285.1/286.3/289.2                 | 284.5/285.0/286.5/288.8                |
| O 1s                  | 529.9/531.4/532.5                       | 530.3/531.2/532.3                      |

## References

1. Z. Chen, Y. Ha, Y. Liu, H. Wang, H. Yang, H. Xu, Y. Li, R. Wu, In Situ Formation of Cobalt nitrides/graphitic carbon composites as efficient bifunctional electrocatalysts for overall water splitting, ACS Appl. Mater. Interfaces 2018, 10, 7134-7144.
2. X. Shu, S. Chen, S. Chen, W. Pan, J. Zhang, Cobalt nitride embedded holey N-doped graphene as advanced bifunctional electrocatalysts for Zn-Air batteries and overall water splitting, Carbon 2020, 157, 234-243.
3. W. Jiang, J. Chen, G. Qian, H. He, H. Zhang, X. Zhuo, F. Shen, L. Luo, S. Yin,

Interfacial electronic engineering of carbon encapsulated  $\text{Co}_{5.47}\text{N}-\text{WO}_2$  for boosting overall water splitting, *Electrochim. Acta* 2021, 390, 138887.

4. J. Zhu, Q. Du, M. A. Khan, H. Zhao, J. Fang, D. Ye, J. Zhang, 2D porous Co-Mo nitride heterostructures nanosheets for highly effective electrochemical water splitting, *Appl. Surf. Sci.* 2023, 623, 156989.

5. G. Zhou, G. Liu, X. Liu, Q. Yu, H. Mao, Z. Xiao, L. Wang, 1D/3D heterogeneous assembling body as bifunctional electrocatalysts enabling Zinc-Air battery and self-powered overall water splitting, *Adv. Funct. Mater.* 2022, 32, 2107608.

6. Y. Hu, Z. Huang, Q. Zhang, T. T. Isimjan, Y. Chu, Y. Mu, B. Wu, Z. Huang, X. Yang, L. Zeng, Interfacial engineering of  $\text{Co}_{5.47}\text{N}/\text{Mo}_5\text{N}_6$  nanosheets with rich active sites synergistically accelerates water dissociation kinetics for Pt-like hydrogen evolution, *J. Colloid Interf. Sci.* 2023, 643, 455-464.

7. Y. Kong, K. Guo, R. Liu, B. Yan, F. Shaik, B. Jiang, Fe/Ni-Doped  $\text{Co}_{5.47}\text{N}$  nanoparticles integrated on nitrogen-doped vertical reduced graphene oxide arrays for overall water splitting in wide pH range, *J. Electrochem. Soc.* 2023, 170, 086506.

8. L. Yang, Y. Liu, L. Wang, Z. Zhao, C. Xing, S. Shi, M. Yuan, Z. Ge, Z. Cai,  $\text{Co}_{5.47}\text{N}/\text{rGO}@/\text{NF}$  as a high-performance bifunctional catalyst for urea-assisted hydrogen evolution, *Catal. Lett.* 2019, 149, 3111-3118.

9. J. Chi, W. Gao, J. Lin, B. Dong, J. Qin, Z. Liu, B. Liu, Y. Chai, C. Liu, Porous core-shell N-doped  $\text{Mo}_2\text{C}@/\text{C}$  nanospheres derived from inorganic-organic hybrid precursors for highly efficient hydrogen evolution, *J. Catal.* 2018, 360, 9-19.

10. W. Deng, H. Jiang, C. Chen, L. Yang, Y. Zhang, S. Peng, S. Wang, Y. Tan, M. Ma, Q. Xie, Co-, N-, and S-tridoped carbon derived from nitrogen- and sulfur enriched polymer and cobalt salt for hydrogen evolution reaction, *ACS Appl. Mater. Interfaces* 2016, 8, 13341-13347.

11. H. Jia, Y. Yao, Y. Gao, D. Lu, P. Du, Pyrolyzed cobalt porphyrin-based conjugated mesoporous polymers as bifunctional catalysts for hydrogen production and oxygen evolution in water, *Chem. Commun.* 2016, 52, 13483-13486.

12. Y. Kim, D. Kim, J. Lee, L. Y. S. Lee, D. K. P. Ng, Tuning the electrochemical properties of polymeric cobalt phthalocyanines for efficient water splitting, *Adv.*

Funct. Mater. 2021, 2103290.

13. Y. Jiang, Y. Lu, J. Lin, X. Wang, Z. Shen, A hierarchical MoP nanoflake array supported on Ni foam: A bifunctional electrocatalyst for overall water splitting, *Small Methods* 2018, 2, 1700369.

14. Z. Wu, J. Wang, K. Xia, W. Lei, X. Liu, D. Wang, MoS<sub>2</sub>-MoP heterostructured nanosheets supported on polymer-derived carbon for hydrogen evolution reaction, *J. Mater. Chem. A* 2018, 6, 616-622.

15. Y. Huang, X. Song, J. Deng, C. Zha, W. Huang, Y. Wu, Y. Li, Ultra-dispersed molybdenum phosphide and phosphosulfide nanoparticles on hierarchical carbonaceous scaffolds for hydrogen evolution electrocatalysis, *Appl. Catal. B: Environ.* 2019, 245, 656-661.

16. D. Zhao, K. Sun, W. Cheong, L. Zheng, C. Zhang, S. Liu, X. Cao, K. Wu, Y. Pan, Z. Zhuang, B. Hu, D. Wang, Q. Peng, C. Chen, Y. Li, Synergistically interactive pyridinic-N-MoP sites: Identified active centers for enhanced hydrogen evolution in alkaline solution, *Angew. Chem. Int. Ed.* 2020, 59, 8982-8990.

17. W. Xiao, L. Zhang, D. Bukhvalov, Z. Chen, Z. Zou, L. Shang, X. Yang, D. Yan, F. Han, T. Zhang, Hierarchical ultrathin carbon encapsulating transition metal doped MoP electrocatalysts for efficient and pH-universal hydrogen evolution reaction, *Nano Energy* 2020, 70, 104445.

18. J. Wang, W. Yang, J. Liu, CoP<sub>2</sub> nanoparticles on reduced graphene oxide sheets as a super efficient bifunctional electrocatalyst for full water splitting, *J. Mater. Chem. A*, 2016, 4, 4686-4690.

19. X.B. He, F.X. Yin, G.R. Li, B.H. Chen, S. Wang, M.C. Gu, CoNi alloys with slight oxidation@N,O Co-doped carbon: enhanced collective contributions of cores and shells to multifunctional electrocatalytic activity and Zn-air batteries, *J. Mater. Chem. A* 2020, 8, 25805-25823.

20. X.F. Zhou, X.L. Yang, M.N. Hedhil, H.N. Li, S.X. Min, J. Ming, K.W. Huang, W.J. Zhang, L.J. Li, Symmetrical synergy of hybrid Co<sub>9</sub>S<sub>8</sub>-MoS<sub>x</sub> electrocatalysts for hydrogen evolution reaction, *Nano Energy* 2017, 32, 470-478.

21. C. Zhu, A.L. Wang, W. Xiao, D. Chao, X. Zhang, N.H. Tiep, S. Chen, J. Kang,

- X. Wang, J. Ding, J. Wang, H. Zhang, H.J. Fan, In situ grown epitaxial heterojunction exhibits high-performance electrocatalytic water splitting. *Adv. Mater.* 2018, 30, e1705516.
22. J. Jia, T.L. Xiong, L.L. Zhao, F.L. Wang, H. Liu, R.Z. Hu, J. Zhou, W.J. Zhou, S.W. Chen, Ultrathin N-doped Mo<sub>2</sub>C nanosheets with exposed active sites as efficient electrocatalyst for hydrogen evolution reactions, *ACS Nano* 2017, 11, 12509-12518.
23. M.X. Li, Y. Zhu, H.Y. Wang, C. Wang, N. Pinna, X.F. Lu, Ni strongly coupled with Mo<sub>2</sub>C encapsulated in nitrogen-doped carbon nanofibers as robust bifunctional catalyst for overall water splitting, *Adv. Energy Mater.* 2019, 9, 1803185.
24. Y. Zhang, Q. Shao, S. Long, X.Q. Huang, Cobalt-molybdenum nanosheet arrays as highly efficient and stable earth-abundant electrocatalysts for overall water splitting, *Nano Energy* 2018, 45, 448-455.
25. W.J. Zhang, J. Zheng, X.D. Gu, B. Tang, J.P. Li, X.G. Wang, Facile synthesis, characterization and DFT studies of a nanostructured nickel–molybdenum–phosphorous planar electrode as an active electrocatalyst for the hydrogen evolution reaction, *Nanoscale* 2019, 11, 9353-9361.
26. Q. Zhang, X.L. Li, B.X. Tao, X.H. Wang, Y.H. Deng, X.Y. Gu, L.J. Li, W. Xiao, N.B. Li, H.Q. Luo, CoNi based alloy/oxides@N-doped carbon core-shell dendrites as complementary water splitting electrocatalysts with significantly enhanced catalytic efficiency, *Appl. Catal. B: Environ.* 2019, 254, 634-646.
27. Y. Zhao, T. Li, J. Gu, B. Zhang, P. Zhai, Z. Xue, H. Gao, Q. Li, Covalent triazine frameworks based on different stacking model as electrocatalyst for hydrogen evolution, *Appl. Surf. Sci.* 2023, 618, 156697.
28. Q. Yuan, Y. Yu, Y. Gong, X. Bi, Three-dimensional N-doped carbon nanotube frameworks on Ni foam derived from a metal-organic framework as a bifunctional electrocatalyst for overall water splitting, *ACS Appl. Mater. Interfaces* 2020, 12, 3592-3602.
29. J. Li, Y. Liu, D. Sun, X. Li, X. Hu, S. Bao, Z. Su, Co<sub>2</sub>P@C derived from metal-organic coordinate interactions using polyaniline as soft template for electrocatalytic hydrogen production, *J. Solid State Chem.* 2021, 299, 122184.

30. J. Feng, L. Ding, S. Ye, X. He, H. Xu, Y. Tong, G. Li, Co(OH)<sub>2</sub>@PANI hybrid nanosheets with 3D networks as high-performance electrocatalysts for hydrogen evolution reaction, *Adv. Mater.* 2015, 27, 7051-7057.
31. D. Vikramana , S. Hussainb, K. Karuppasamy, A. Ferozed, A. Kathalingame, A. Sanmugamf , S. Chund , J. Jungb, H. S. Kim, Engineering the novel MoSe<sub>2</sub>-Mo<sub>2</sub>C hybrid nanoarray electrodes for energy storage and water splitting applications, *Appl. Catal. B: Environ.* 2020, 264, 118531.
32. K. Ojhaa , S. Sahaa , H. Kolevc , B. Kumara , A. K. Ganguli, Composites of graphene-Mo<sub>2</sub>C rods: highly active and stable electrocatalyst for hydrogen evolution reaction, *Electrochim. Acta* 2016, 193, 268-274.
33. A. Bovas, D. Thangavelu, K. V. Pillai, T. P. Radhakrishnan, An in situ fabricated hydrogel polymer-palladium nanocomposite electrocatalyst for the HER: Critical role of the polymer in realizing high efficiency and stability, *Chem. Eur. J.* 2023, e202302593.
34. Baghendra Singh, Om Prakash, Pralay Maiti, Prashanth W. Menezes, Arindam Indra, Electrochemical transformation of Prussian blue analogues into ultrathin layered double hydroxide nanosheets for water splitting, *Chem. Commun.* 2020, 56, 15036-15039.
35. X. Zhang, S. Zhu, L. Xia, C. Si, F. Qu, F. Qu, Ni(OH)<sub>2</sub>-Fe<sub>2</sub>P hybrid nanoarray for alkaline hydrogen evolution reaction with superior activity. *Chem. Commun.* 2018, 54, 1201-1204.
